# Supplementary material
Source: PubMed Central journal article supplement (PMC3694691)
Supplement: supp_tpc.113.110486_tpc110486Supplemental.pdf [file supp_tpc.113.110486_tpc110486Supplemental.pdf]

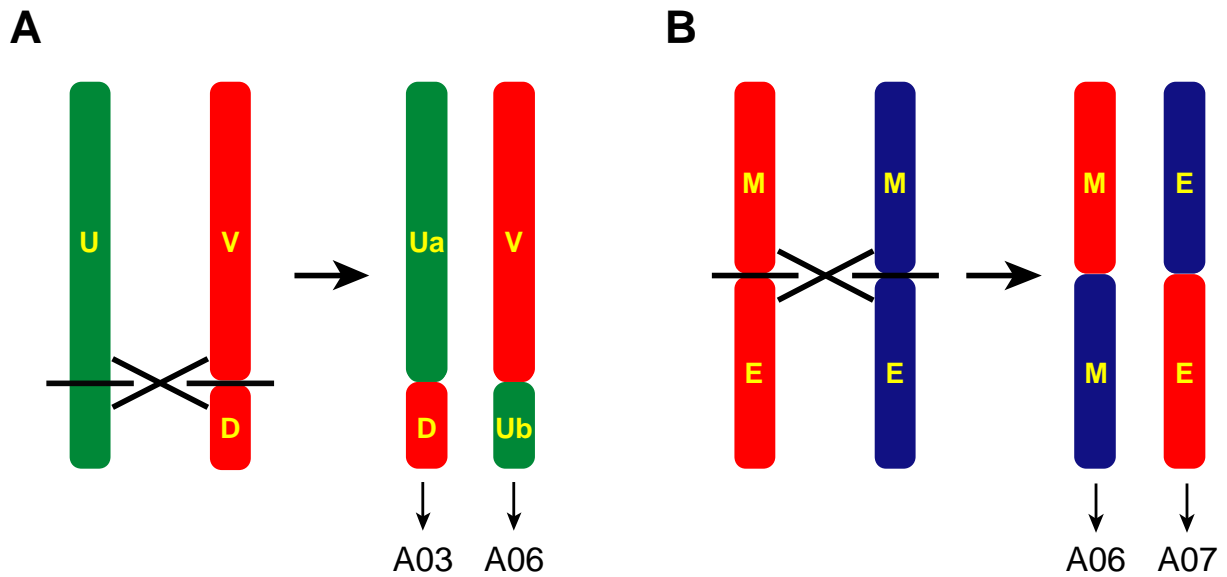

**Supplemental Figure 1. Purported translocation events reshuffling tPCK-specific associations D/V and M/E in the *B. rapa* genome.**

**(A)** Translocation between block  $U_{MF1}$  and block association D/ $V_{LF}$  resulted in block associations Ua/D and V/Ub on *B. rapa* chromosomes A03 and A06, respectively. **(B)** Translocation between two M/E associations from subgenomes LF and MF2 resulted in associations  $M_{LF}/M_{MF2}$  and  $E_{LF}/E_{MF2}$  on chromosomes A06 and A07, respectively.

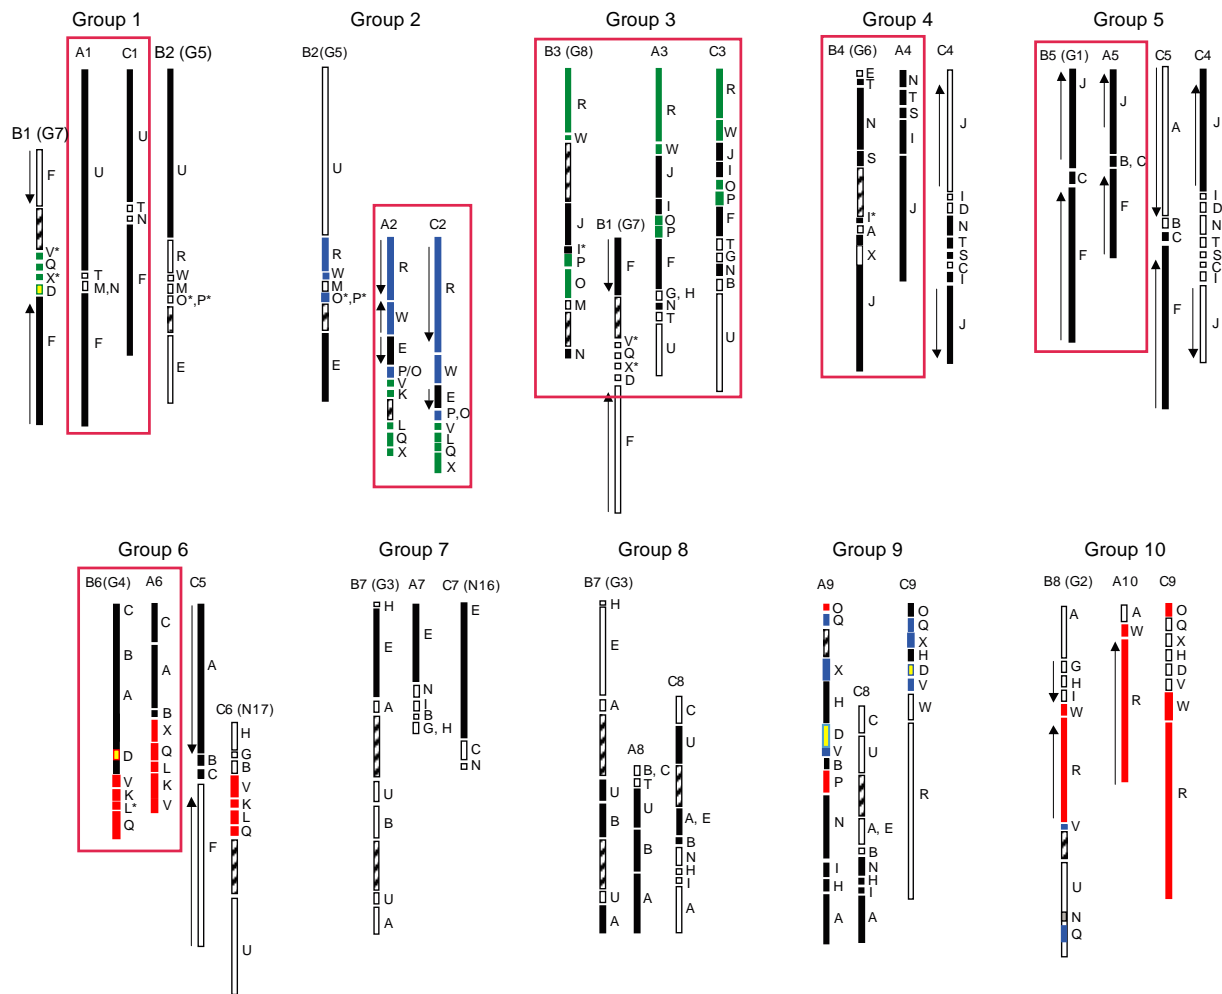

**Supplemental Figure 2. Chromosome collinearity comparison among A, B, and C genomes, revised from Panjabi et al. (2008).**

PCK-specific GB associations O/P/W/R and V/K/L/Q/X are colored to distinguish subgenomes: red = LF, green = MF1, blue = MF2. Within the colored GB associations, each copy of block D associated with block V is indicated in yellow. The entire chromosomes A1 and C1, and A2 and C2 have a similar block orders between A and C genomes; the structures of A4 and B4, A5 and B5, and A6 and B6 are shared between genomes A and B; A3, B3, and C3 share similar chromosome structures between A, B, and C genomes.

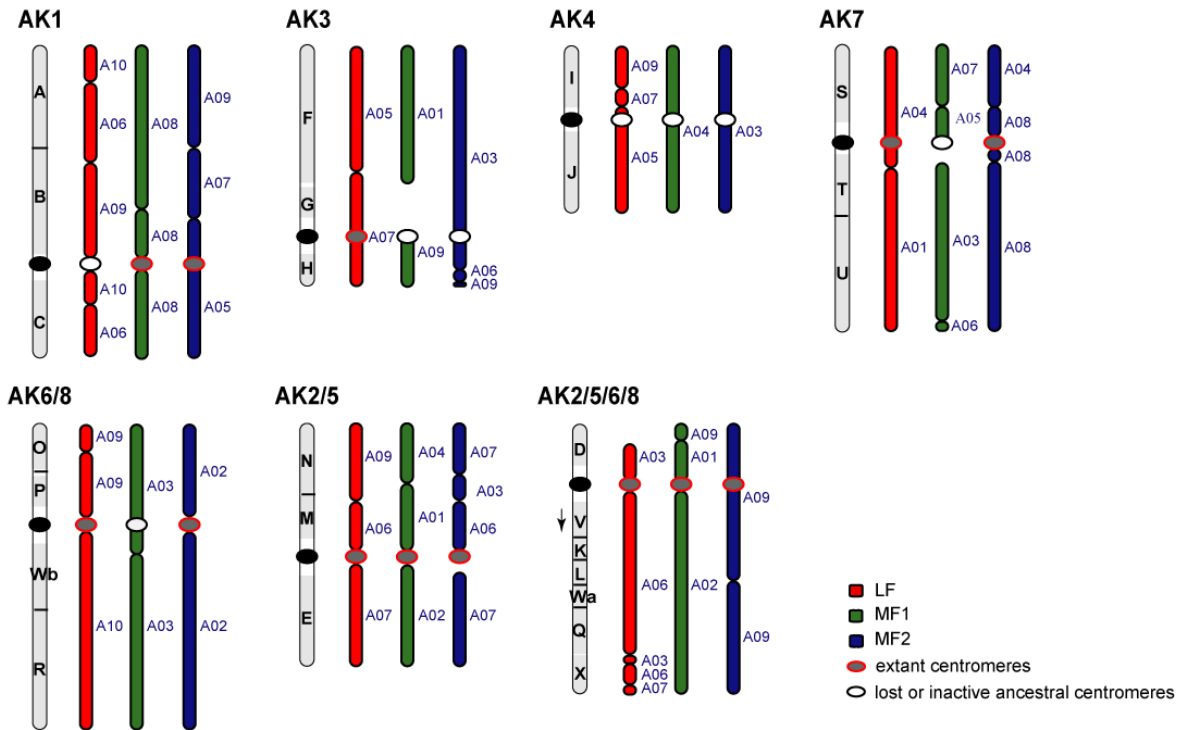

**Supplemental Figure 3. Reconstruction of three tPCK-like ancestral subgenomes in *B. rapa*.**

tPCK-like genomes each comprising 24 genomic blocks (A–X) were reconstructed for the three *B. rapa* subgenomes (least fractionated [LF], medium fractionated [MF1], and most fractionated [MF2]). The downward pointing arrow refers to the genomic block inverted relative to the position within the ACK.

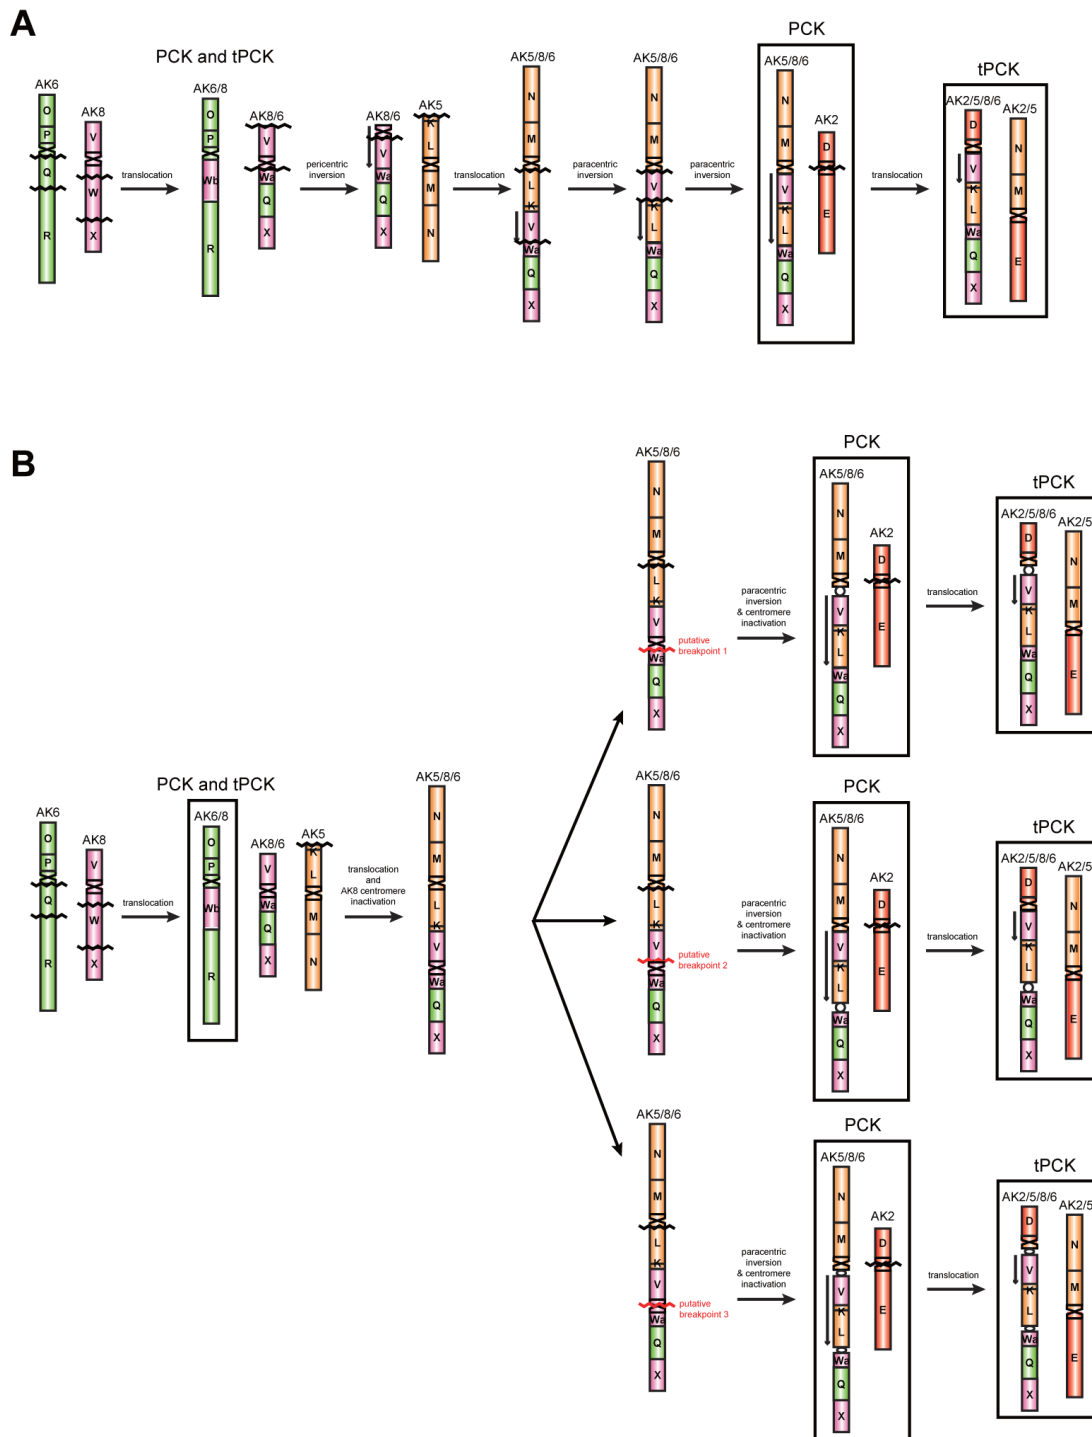

**Supplemental Figure 4. Two alternative origins of translocation chromosomes AK5/6/8 (PCK) and AK2/5/6/8 (tPCK).**

Genomic blocks are indicated by capital letters and colored according to their positions on ancestral chromosomes (see Figure 2A). Downward pointing arrows indicate the opposite orientation of GBs compared to their ancestral position within the ACK. Scenario (A) involves a double inversion of genomic block V, whereas alternative (B) is based on a paracentric inversion of V/K/L and accompanying inactivation of the AK8 paleocentromere. The position(s) of the inactivated centromere depend(s) on the position of the inversion breakpoint within the AK8 (peri)centromere.

**Supplemental Table 1.** Summary of genomic blocks identified in *B. rapa*. Red color labels indicate GBs without rearrangements; yellow color labels indicate GBs that were broken; blue color labels indicate GBs with fragmental deletions.

| GB | <i>A. thaliana</i>  | <i>B. rapa</i> interval            |                         |                         |
|----|---------------------|------------------------------------|-------------------------|-------------------------|
|    | interval            | LF                                 | MF1                     | MF2                     |
| A  | AT1G01560_AT1G02190 | Bra033253_Bra033213_A10            | Bra030497_Bra030497_A08 | Bra032640_Bra032670_A09 |
|    | AT1G02220_AT1G07630 | Bra033301_Bra015596_A10            | Bra030498_Bra030695_A08 | Bra032614_Bra031587_A09 |
|    | AT1G07640_AT1G19330 | Bra018693_Bra025729_A06            | Bra030696_Bra016509_A08 | Bra031588_Bra031076_A09 |
| B  | AT1G19850_AT1G21910 | Bra025775_Bra017957_A06            | Bra016492_Bra016401_A08 | Bra012190_Bra012297_A07 |
|    | AT1G21920_AT1G24210 | Bra031352_Bra024644_A09            | Bra016400_Bra016318_A08 | Bra012298_Bra012416_A07 |
|    | AT1G24220_AT1G27220 | Bra032811_Bra024646_A09            | Bra010955_Bra016317_A08 | Bra030032_Bra012417_A07 |
|    | AT1G27240_AT1G29020 | Bra032813_Bra032925_A09            | Bra010954_Bra010851_A08 | Bra030033_Bra030121_A07 |
|    | AT1G29030_AT1G30970 | Bra032290_Bra023153_A09            | Bra010850_Bra010764_A08 | Bra030122_Bra014897_A07 |
|    | AT1G30972_AT1G31750 | Bra023154_Bra023199_A09            | Bra038403_Bra038434_A08 | Bra014898_Bra014913_A07 |
|    | AT1G31760_AT1G36240 | Bra023200_Bra028085_A09            | Bra038435_Bra036766_A08 | Bra033887_Bra034400_A05 |
| C  | AT1G43600_AT1G47260 | Bra036926_Bra040713_Scaffold000123 | Bra014019_Bra014069_A08 | Bra032192_Bra032220_A05 |
|    | AT1G47270_AT1G47946 | Bra015624_Bra015599_A10            | Bra014070_Bra014098_A08 | Bra032233_Bra032228_A05 |
|    | AT1G47960_AT1G56120 | Bra018695_Bra038035_A06            | Bra014099_Bra030816_A08 | Bra032221_Bra037091_A05 |
| D  | AT1G56530_AT1G62045 | Bra017901_Bra017885_A03            | Bra035468_Bra028377_A01 | Bra027924_Bra027067_A09 |
|    | AT1G62060_AT1G63770 | Bra034461_Bra004106_scaffold       | Bra036663_Bra027789_A09 | Bra027066_Bra027663_A09 |
| E  | AT1G65040_AT1G67210 | Bra004109_Bra004209_A07            | Bra022497_Bra034014_A02 | -                       |
|    | AT1G67220_AT1G79720 | Bra004210_Bra035139_A07            | Bra034013_Bra008428_A02 | Bra004099_Bra003596_A07 |
|    | AT1G79760_AT1G80420 | Bra035206_Bra035184_A07            | Bra008503_Bra008474_A02 | Bra003527_Bra003565_A07 |
| F  | AT3G01040_AT3G02070 | Bra039149_Bra039109_A05            | Bra021479_Bra040520_A01 | Bra001025_Bra000980_A03 |
|    | AT3G02080_AT3G23150 | Bra039150_Bra033888_A05            | Bra021478_Bra023756_A01 | Bra001028_Bra001904_A03 |
|    | AT3G23160_AT3G25520 | Bra014914_Bra015128_A07            | Bra023755_Bra028373_A01 | Bra001905_Bra013215_A03 |
| G  | AT2G05170_AT2G10931 | Bra015164_Bra015187_A07            | -                       | Bra013178_Bra013160_A03 |
| H  | AT2G10940_AT2G17090 | Bra015198_Bra002020_A07            | Bra037196_Bra037283_A09 | Bra013156_Bra013035_A03 |
|    | AT2G17110_AT2G19470 | Bra002021_Bra039003_A07            | Bra037281_Bra036721_A09 | Bra009665_Bra024449_A06 |
|    | AT2G19480_AT2G20900 | Bra039004_Bra036507_A07            | Bra036720_Bra036670_A09 | Bra031083_Bra031147_A09 |
| I  | AT2G20920_AT2G26660 | Bra031151_Bra007748_A09            | Bra030326_Bra034308_A04 | Bra000588_Bra000539_A03 |
|    | AT2G26670_AT2G29090 | Bra012054_Bra028390_A07            | Bra034312_Bra039963_A04 | Bra000561_Bra000478_A03 |
| J  | AT2G31040_AT2G40420 | Bra018282_Bra004963_A05            | Bra021690_Bra017005_A04 | Bra022823_Bra000184_A03 |
|    | AT2G40430_AT2G46130 | Bra004567_Bra004962_A05            | Bra017004_Bra039289_A04 | Bra000185_Bra000413_A03 |
|    | AT2G46140_AT2G47730 | Bra004566_Bra004434_A05            | Bra039288_Bra021440_A04 | Bra000414_Bra000460_A03 |
| K  | AT2G01250_AT2G03750 | Bra024895_Bra025130_A06            | Bra014334_Bra026541_A02 | Bra017461_Bra017375_A09 |
| L  | AT3G25855_AT3G29770 | Bra025166_Bra025404_A06            | Bra036363_Bra033110_A02 | Bra017345_Bra036205_A09 |
| M  | AT3G43740_AT3G49970 | Bra019444_Bra017958_A06            | Bra037606_Bra029985_A01 | Bra019453_Bra019606_A06 |
| N  | AT3G50950_AT3G51860 | Bra036844_Bra006881_A09            | Bra038875_Bra038910_A01 | Bra012876_Bra012833_A03 |
|    | AT3G51870_AT3G52760 | Bra006882_Bra006945_A09            | Bra033476_Bra019650_A04 | Bra012832_Bra012799_A03 |
|    | AT3G52770_AT3G62790 | Bra006946_Bra007701_A09            | Bra019649_Bra014392_A04 | Bra028531_Bra003510_A07 |

|          |                     |                         |                         |                         |
|----------|---------------------|-------------------------|-------------------------|-------------------------|
| <b>O</b> | AT4G00030_AT4G00780 | Bra037309_Bra037358_A09 | Bra000979_Bra000955_A03 | Bra008511_Bra008532_A02 |
|          | AT4G00800_AT4G01380 | Bra037410_Bra037362_A09 | Bra000929_Bra000954_A03 | Bra008544_Bra008533_A02 |
|          | AT4G01390_AT4G03728 | Bra037411_Bra034225_A09 | Bra000928_Bra000815_A03 | Bra008545_Bra018514_A02 |
|          | AT4G03740_AT4G04955 | Bra029471_Bra029537_A09 | Bra000780_Bra000810_A03 | Bra018492_Bra018508_A02 |
| <b>P</b> | AT4G08690_AT4G12070 | Bra037874_Bra029437_A09 | Bra000655_Bra000760_A03 | Bra033210_Bra033122_A02 |
| <b>Q</b> | AT5G23030_AT5G23270 | Bra013010_Bra013029_A03 | Bra029357_Bra029365_A02 | Bra026507_Bra026507_A09 |
|          | AT5G23280_AT5G28470 | Bra009667_Bra009996_A06 | Bra029366_Bra020609_A02 | Bra026506_Bra036119_A09 |
|          | AT5G28490_AT5G28885 | Bra009997_Bra010012_A06 | Bra020610_Bra020621_A02 | Bra036134_Bra036126_A09 |
| <b>R</b> | AT5G01240_AT5G02000 | Bra009636_Bra009646_A10 | Bra005693_Bra005657_A03 | Bra028894_Bra028918_A02 |
|          | AT5G02010_AT5G23010 | Bra009621_Bra002448_A10 | Bra005701_Bra006645_A03 | Bra028883_Bra020228_A02 |
| <b>S</b> | AT5G33210_AT5G37810 | Bra028101_Bra028151_A04 | Bra039484_Bra039503_A05 | Bra038948_Bra035522_A08 |
|          | AT5G37830_AT5G41900 | Bra028154_Bra025457_A04 | Bra028392_Bra028514_A07 | Bra025434_Bra030327_A04 |
| <b>T</b> | AT4G12750_AT4G13985 | Bra032672_Bra033456_A04 | -                       | Bra034911_Bra040347_A08 |
|          | AT4G13990_AT4G14140 | Bra032753_Bra032760_A04 | -                       | Bra038960_Bra038444_A08 |
|          | AT4G14145_AT4G14490 | Bra032763_Bra033481_A04 | -                       | Bra010747_Bra010762_A08 |
|          | AT4G14500_AT4G15160 | Bra036864_Bra039563_A01 | -                       | Bra039861_Bra038089_A08 |
|          | AT4G15180_AT4G16160 | Bra039562_Bra033542_A01 | Bra012769_Bra012736_A03 | Bra038088_Bra038039_A08 |
|          | AT4G16162_AT4G16143 | Bra033544_Bra033534_A01 | Bra012735_Bra012741_A03 | Bra021082_Bra038043_A08 |
| <b>U</b> | AT4G16250_AT4G24180 | Bra033549_Bra013773_A01 | Bra012725_Bra019243_A03 | Bra021080_Bra010549_A08 |
|          | AT4G24190_AT4G28405 | Bra013774_Bra026259_A01 | Bra019235_Bra024205_A03 | Bra010500_Bra010369_A08 |
|          | AT4G28410_AT4G35320 | Bra040157_Bra011606_A01 | Bra024204_Bra017708_A03 | Bra010368_Bra020811_A08 |
|          | AT4G35335_AT4G36120 | Bra011607_Bra011663_A01 | Bra017709_Bra017748_A03 | Bra010537_Bra010501_A08 |
|          | AT4G36130_AT4G38170 | Bra011664_Bra011805_A01 | Bra017749_Bra017884_A03 | Bra010550_Bra010636_A08 |
|          | AT4G38190_AT4G38770 | Bra011900_Bra011893_A01 | Bra033554_Bra033575_A06 | Bra010746_Bra010727_A08 |
| <b>V</b> | AT5G42130_AT5G47780 | Bra033636_Bra024917_A06 | Bra021948_Bra022156_A02 | Bra027974_Bra017467_A09 |
| <b>W</b> | AT5G47820_AT5G50750 | Bra037951_Bra037925_A10 | Bra000592_Bra000630_A03 | Bra020729_Bra022524_A02 |
|          | AT5G50760_AT5G60800 | Bra035710_Bra002450_A10 | Bra022763_Bra006647_A03 | Bra022525_Bra020229_A02 |
| <b>X</b> | AT5G60810_AT5G61760 | Bra013006_Bra012923_A03 | Bra029354_Bra029318_A02 | Bra035957_Bra035915_A09 |
|          | AT5G61770_AT5G65925 | Bra019611_Bra024431_A06 | Bra029309_Bra031843_A02 | Bra035914_Bra037833_A09 |
|          | AT5G65930_AT5G67385 | Bra012055_Bra012158_A07 | Bra031800_Bra031830_A02 | Bra037195_Bra037116_A09 |

**Supplemental Table 2.** Genomic blocks E, G, and T showing sequence deletion in *B. rapa* (Br) as compared with *Arabidopsis thaliana* (At).

|          | At block interval     | Deleted fragment in Br (subgenome) | Size of deleted fragment % (Mb) |
|----------|-----------------------|------------------------------------|---------------------------------|
| <b>E</b> | AT1G65040 - AT1G80420 | AT1G65040 - AT1G67210 (MF2)        | 3.92% (0.98)                    |
| <b>G</b> | AT2G05170 - AT2G17090 | AT2G05170 - AT2G17090 (MF1)        | 100% (5.57)                     |
| <b>T</b> | AT4G12750 - AT4G16143 | AT4G12750 - AT4G15160 (MF1)        | 29.82% (1.15)                   |

**Supplemental Table 3.** Number of genomic blocks with different fragmental status in *B. rapa* subgenomes.

|                          | LF | MF1 | MF2 | Total |
|--------------------------|----|-----|-----|-------|
| <b>Complete</b>          | 15 | 16  | 17  | 48    |
| <b>Broken</b>            | 9  | 6   | 6   | 21    |
| <b>Terminal deletion</b> | 0  | 1   | 1   | 2     |
| <b>Complete deletion</b> | 0  | 1   | 0   | 1     |
| <b>Sum</b>               | 24 | 24  | 24  | 72    |

**Supplemental Table 4.** Frequency of tPCK-specific block associations in each of the three *B. rapa* subgenomes.

| Chr <sup>a</sup> | GB assoc. <sup>b</sup> | # <sup>c</sup> | LF  | MF1 | MF2 |
|------------------|------------------------|----------------|-----|-----|-----|
| <b>AK1</b>       | A-B                    | 2              | A06 | A08 | -   |
|                  | B-C                    | 2              | -   | A08 | A05 |
| <b>AK3</b>       | F-G                    | 2              | A07 | -   | A03 |
|                  | G-H                    | 2              | A07 | -   | A03 |
| <b>AK4</b>       | I-J                    | 2              | -   | A04 | A03 |
| <b>AK7</b>       | S-T                    | 2              | A04 | -   | A08 |
|                  | T-U                    | 3              | A01 | A03 | A08 |
| <b>AK6/8</b>     | O-P                    | 3              | A09 | A03 | A02 |
|                  | P-W                    | 1              | -   | A03 | -   |
|                  | W-R                    | 3              | A10 | A03 | A02 |
| <b>AK2/5</b>     | N-M                    | 3              | A09 | A01 | A03 |
|                  | M-E                    | 0              | -   | -   | -   |
| <b>AK2/5/6/8</b> | D-V                    | 1              | -   | -   | A09 |
|                  | V-K                    | 3              | A06 | A02 | A09 |
|                  | K-L                    | 3              | A06 | A02 | A09 |
|                  | L-Q                    | 3              | A06 | A02 | A09 |
|                  | Q-X                    | 3              | A03 | A02 | A09 |
| <b>Sum</b>       | 17                     | 38             | 12  | 12  | 14  |

<sup>a</sup>chromosome.<sup>b</sup>genomic block association.<sup>c</sup>copy number of GB association in the *B. rapa* genome.**Supplemental Table 5.** Number of syntenic genes shared between each *B. rapa* subgenome and the *Arabidopsis thaliana* genome (At).

|                               | LF     | MF1    | MF2   |
|-------------------------------|--------|--------|-------|
| <b>#genes</b>                 | 16,271 | 11,633 | 9,653 |
| <b>#syntenic to At</b>        | 12,914 | 8,905  | 7,719 |
| <b>#syntenic to At/#genes</b> | 0.79   | 0.77   | 0.80  |

**Supplemental Table 6.** The frequency of tPCK-specific block associations in *B. rapa* and *B. oleracea*.

| GB     |   | <i>B. rapa</i> |   | <i>B. oleracea</i>                                |  |
|--------|---|----------------|---|---------------------------------------------------|--|
| Assoc. | # | Chromosome     | # | Scaffold                                          |  |
| O-P    | 3 | A02, A03, A09  | 3 | Scaffold000203, Scaffold000059, Scaffold000335    |  |
| P-W    | 1 | A03            | 1 | Scaffold000168                                    |  |
| W-R    | 3 | A02, A03, A10  | 3 | Scaffold000032, Scaffold000030_P1, Scaffold000085 |  |
| D-V    | 1 | A09            |   | Scaffold000035_P2                                 |  |
| V-K    | 3 | A02, A06, A09  | 3 | Scaffold000254, Scaffold000170, Scaffold000135    |  |
| K-L    | 3 | A02, A06, A09  | 3 | Scaffold000006, Scaffold000126, Scaffold000048    |  |
| L-V    | 3 | A02, A06, A09  | 3 | Scaffold000006, Scaffold000045, Scaffold000049    |  |
| V-Q    | 3 | A02, A06, A09  | 3 | Scaffold000153, Scaffold000449, Scaffold000049    |  |
| Q-X    | 2 | A02, A09       | 2 | Scaffold000030_P2, Scaffold000150                 |  |

**Supplemental Table 7.** List of genomic blocks comprising the nine linkage groups of *Raphanus sativus* (Shirasawa et al., 2011).

| LG1 | LG2 | LG3 | LG4 | LG5 | LG6 | LG7 | LG8 | LG9 |
|-----|-----|-----|-----|-----|-----|-----|-----|-----|
| S   | S   | F   | N   | E   | E   | A   | O   | C   |
| N   | F   | B   | I   | W   | W   | B   | J   | A   |
| E   | H   | A   | J   | P   | R   | U   | W   | C   |
| N   | F   | M   | I   | O   | P   | S   | R   | B   |
| E   | D   | N   | S   | M   | O   | C   |     | A   |
| R   | X   | C   | V   | R   | Q   | K   |     |     |
|     | Q   | H   | L   | X   | L   |     |     |     |
|     | L   | X   | Q   | W   | V   |     |     |     |
|     | K   | M   | X   | R   | D   |     |     |     |
|     | V   | F   | U   | T   |     |     |     |     |
|     | H   |     |     | U   |     |     |     |     |
|     | A   |     |     |     |     |     |     |     |
|     | N   |     |     |     |     |     |     |     |
|     | F   |     |     |     |     |     |     |     |
|     | M   |     |     |     |     |     |     |     |
|     | I   |     |     |     |     |     |     |     |
|     | J   |     |     |     |     |     |     |     |

**Supplemental References:**

Panjabi, P., Jagannath, A., Bisht, N.C., Padmaja, K.L., Sharma, S., Gupta, V., Pradhan, A.K., and Pental, D. (2008). Comparative mapping of *Brassica juncea* and *Arabidopsis thaliana* using Intron Polymorphism (IP) markers: homoeologous relationships, diversification and evolution of the A, B and C *Brassica* genomes. BMC Genomics **9**: 113.

Shirasawa, K., Oyama, M., Hirakawa, H., Sato, S., Tabata, S., Fujioka, T., Kimizuka-Takagi, C., Sasamoto, S., Watanabe, A., Kato, M., Kishida, Y., Kohara, M., Takahashi, C., Tsuruoka, H., Wada, T., Sakai, T., and Isobe, S. (2011). An EST-SSR linkage map of *Raphanus sativus* and comparative genomics of the Brassicaceae. DNA Res. **18**: 221-232.
